# Supplementary material
Source: publisher site journal article supplement (https://www.dovepress.com/article/360555)

**Supplementary Table 1.** Acupoint and description of acupoint location

| acupoint | Description of acupoint location |
| --- | --- |
| Xiyan (EX-LE5) | In the medial depression of the patella and the patellar ligament. |
| Dubi (ST35) | In the lateral depression of the patella and the patellar ligament. |
| Liangqiu (ST34) | On the line between the anterior superior iliac spine and the iliac base, about 1.3mm above the lateral iliac base. |
| Xuehai (SP10) | On the eminence of the head medial to the quadriceps femoris, about 1.3mm above the medial iliac base. |

**Supplementary Table 2.** Scheme for the histopathological assessment of the three features of chronic synovitis

| Enlargement of the synovial lining cell layer | 0 points | The lining cells form one layer |
| --- | --- | --- |
| 1 point | The lining cells form 2–3 layers |
| 2 points | The lining cells form 4–5 layers, few multinucleated cells might occur |
| 3 points | The lining cells form more than 5 layers, the lining might be ulcerated and multinucleated cells might occur |
| The density of the resident cells | 0 points | The synovial stroma shows normal cellularity |
| 1 point | The cellularity is slightly increased |
| 2 points | The cellularity is moderately increased, multinucleated cells might occur |
| 3 points | The cellularity is greatly increased, multinucleated giant cells, pannus formation and rheumatoid granulomas might occur |
| Inflammatory infiltrate | 0 points | No inflammatory infiltrate |
| 1 point | Few mostly perivascular situated lymphocytes or plasma cells |
| 2 points | Numerous lymphocytes or plasma cells, sometimes forming follicle-like aggregates |
| 3 points | Dense band-like inflammatory infiltrate or numerous large follicle-like aggregates |
| Sum 0 or 1 | No synovitis | |
| Sum 2–4 | Low-grade synovitis | |
| Sum 5–9 | High-grade synovitis | |

**Supplementary Table 3.** The OARSI template to estimate the histopathological grade of KOA

| Grade (key feature) | Associated criteria (tissue reaction) |
| --- | --- |
| Grade 0: surface intact, cartilage morphology intact | Matrix: normal architecture  Cells: intact, appropriate orientation |
| Grade 1: surface intact | Matrix: superficial zone intact, edema and/or superficial fibrillation (abrasion), focal superficial matrix condensation  Cells: death, proliferation (clusters), hypertrophy, superficial zone  The reaction must be more than superficial fibrillation only |
| Grade 2: surface discontinuity | As above  ＋ Matrix discontinuity at superficial zone (deep fibrillation)  ± Cationic stain matrix depletion (Safranin O or Toluidine Blue) upper 1/3 of cartilage  ± Focal perichondronal increased stain (mid zone)  ± Disorientation of chondron columns  Cells: death, proliferation (clusters), hypertrophy |
| Grade 3: vertical  fissures (clefts) | As above  Matrix vertical fissures into mid zone, branched fissures  ±Cationic stain depletion (Safranin O or Toluidine Blue) into lower 2/3 of cartilage (deep zone)  ±New collagen formation (polarized light microscopy, Picro Sirius Red stain)  Cells: death, regeneration (clusters), hypertrophy, cartilage domains adjacent to fissures |
| Grade 4: erosion | Cartilage matrix loss: delamination of superficial layer, mid-layer cyst formation  Excavation: matrix loss superficial layer and mid zone |
| Grade 5: denudation | Surface: sclerotic bone or reparative tissue, including fibrocartilage within the denuded surface. Microfracture with  repair limited to the bone surface |
| Grade 6: deformation | Bone remodeling (more than osteophyte formation only). Includes: microfracture with fibrocartilaginous and osseous  repair extending above the previous surface |

Grade = depth progression into cartilage.

**Supplementary Figure 1.** Annotation of acupoints in supine mice


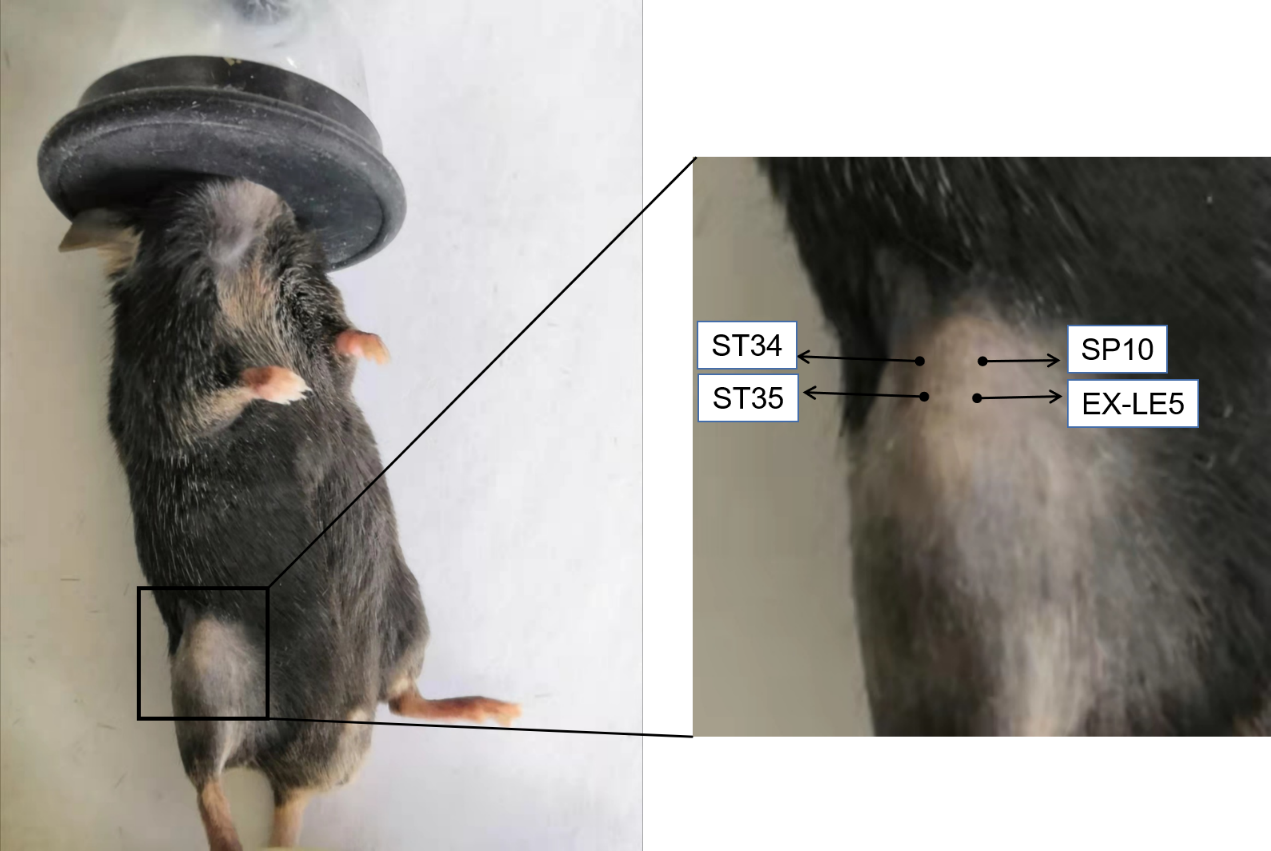


**Supplementary Figure 2.** The electronic intelligent fire needling acupuncture


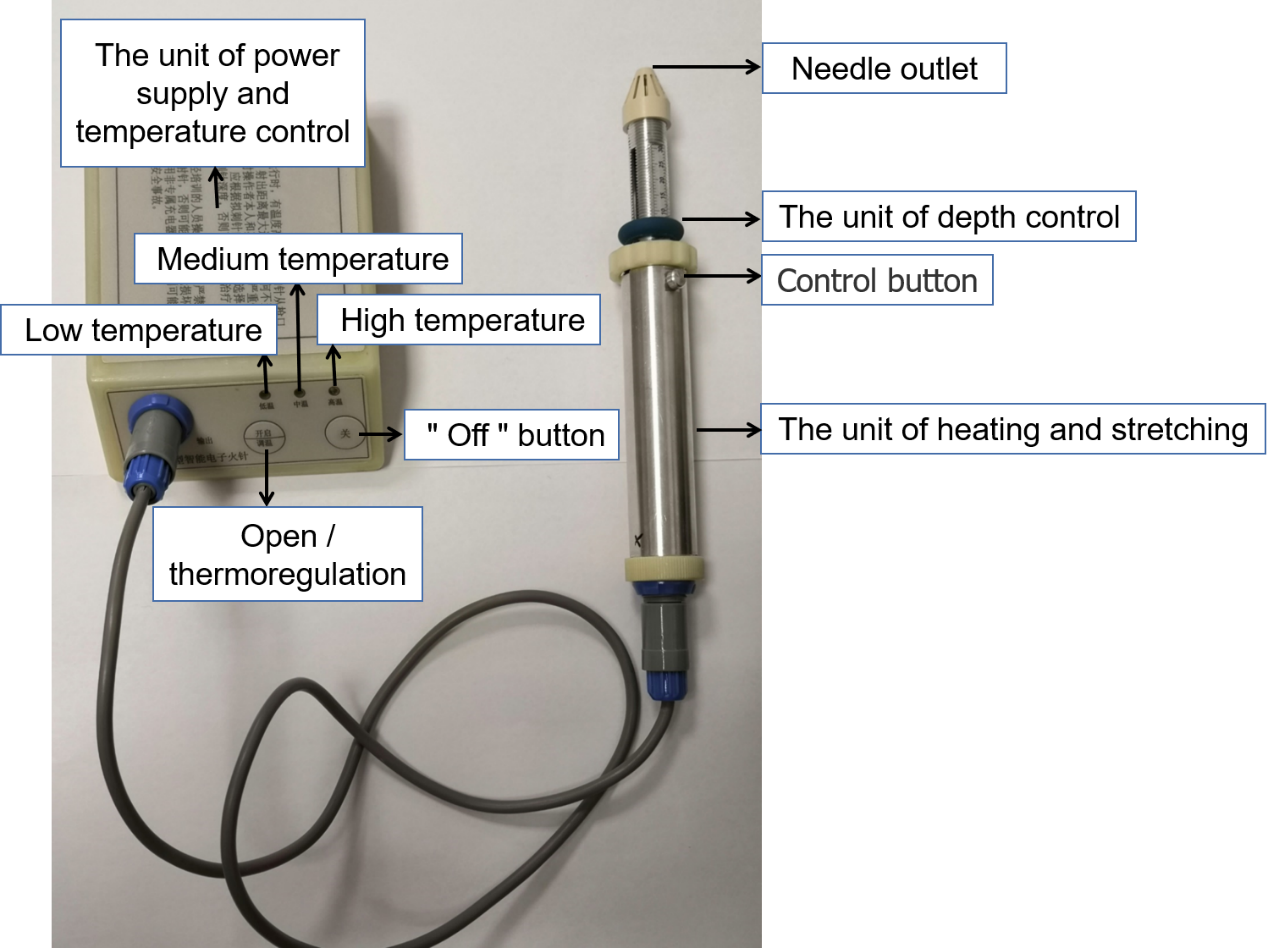


**Supplementary Figure 3.** The procedure of needling in mice


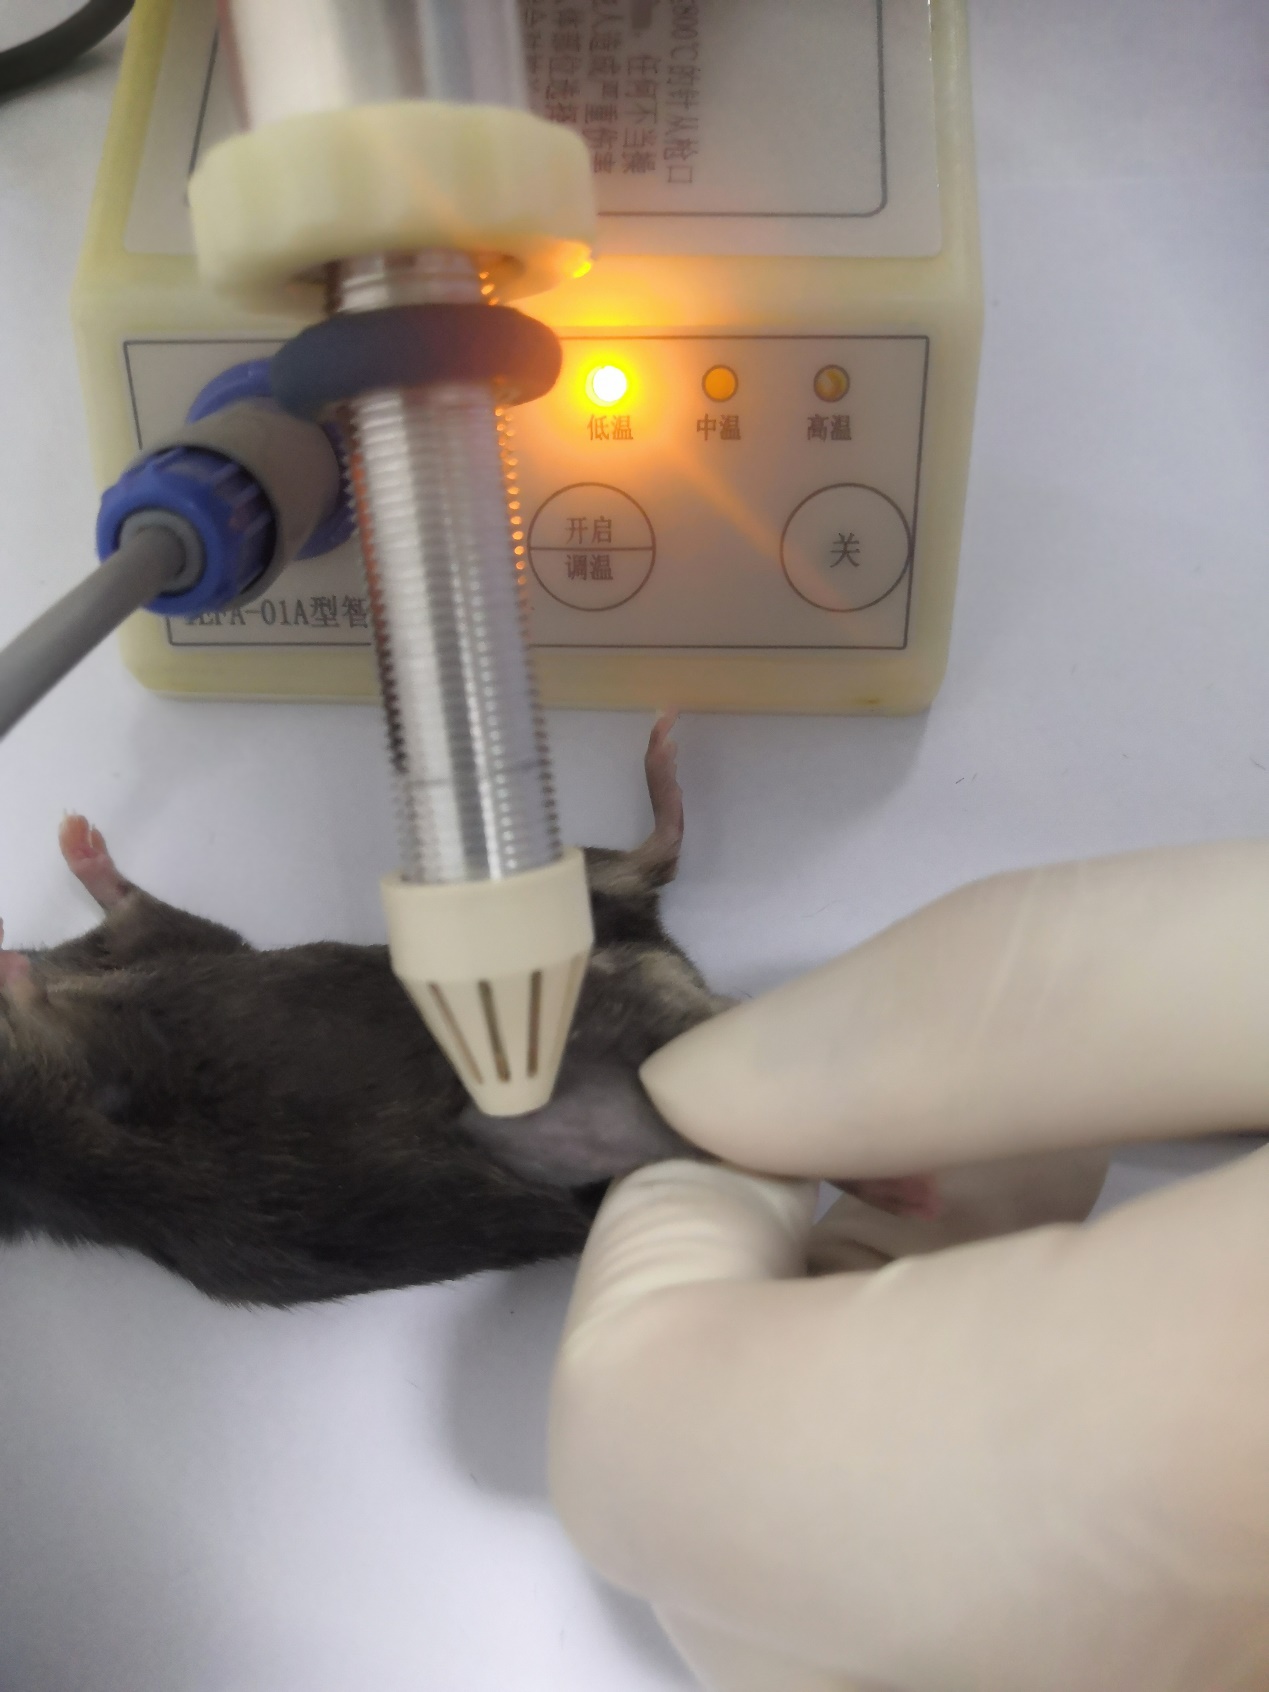


**Supplementary Figure 4.** Hematoxylin and eosin (HE) staining of the whole joint


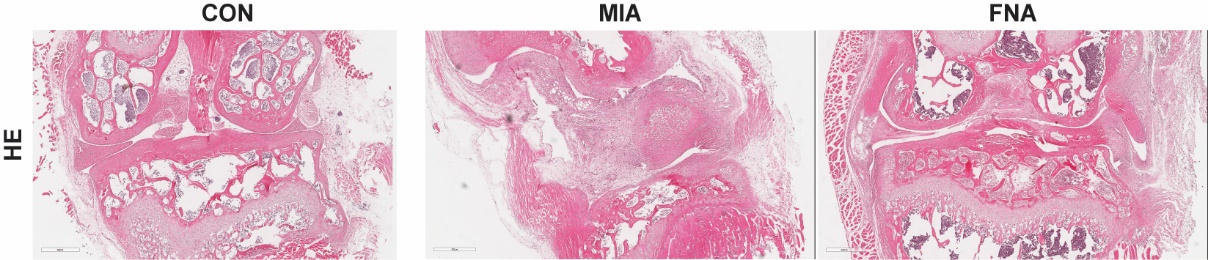


**Supplementary Figure 5.** Comparison of serum inflammatory cytokine concentrations


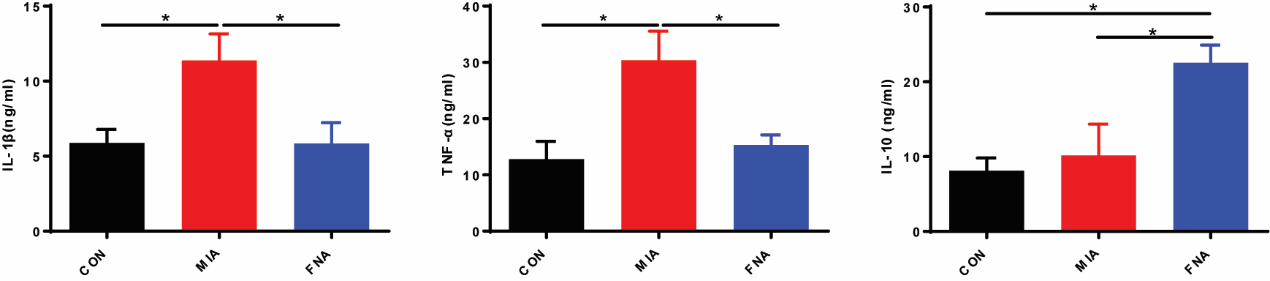

Supplement: Supplementary file 1 [file get_supplementary_file.php]
